# Supplementary material for: Adjusting to the Information Environment: News Tangibility and Mutual Fund Performance
Source: Atypon-hosted journal article supplement (doi:10.1287/mnsc.2017.2835), 2017-09-22
Supplement: mnsc.2017.2835-sm.pdf [file mnsc.2017.2835-sm.pdf]

### Electronic Appendix: Table 1 Fund Performance and $RTI$ Based on Bounded Measure of Change-in-Holdings

This table shows the regressions of fund monthly  $Alpha$  on fund  $RTI$  constructed from the bounded measure of change-in-holdings (indexed  $M$ ). Superscripts  $TG$  and  $ATG$  denote the corresponding underlying stock-level tangibility measures.  $AVG^{4Q}(RTI)$  denotes the average of the respective  $RTI$  variable over the past four quarters.  $Alpha$  is computed as the fund's net return in excess of the return predicted by the four-factor model (MKT, SMB, HML, and MOM) in which the factor loadings are estimated over the 36 months preceding the observation period. Panels A and B show the OLS and the Fama-Macbeth regressions, respectively. The coefficients for  $Illiquidity$ ,  $LogTNA$ ,  $LogAge$ ,  $ExpRatio$ ,  $Turnover$ , and  $Flow$  are scaled by  $10^3$ . The control variables are defined as in Table 1 of the paper.  $T$ -statistics are reported in parentheses. \* (\*\*, \*\*\*) indicates the significance of the coefficient at the 10% (5%, 1%) level. The construction methodology for  $RTI_M$  parallels that in the paper for  $RTI_K$  but is based on the following change-in-holdings measure:

$$\Delta Holdings_{imt}^M = \frac{NumShares_{imt} - \frac{NumShares_{imt-1} + NumShares_{imt}}{2}}{\frac{NumShares_{imt-1} + NumShares_{imt}}{2}}$$

Here,  $i$  indexes stocks,  $m$  indexes funds, and  $t$  indexes time periods (quarters). This measure is bounded between -1 and 1 and is equal to 1 (-1) in all cases when the fund increases (decreases) its share ownership of the stock from 0 (some positive stake) to some positive stake (0).

**Panel A: OLS regressions**

Dependent Variable: Alpha

|                               | (1)                  | (2)                  | (3)                  | (4)                  | (5)                  | (6)                  | (7)                  | (8)                  | (9)                  | (10)                 | (11)                 | (12)                 |
|-------------------------------|----------------------|----------------------|----------------------|----------------------|----------------------|----------------------|----------------------|----------------------|----------------------|----------------------|----------------------|----------------------|
| $RTI_{M,t-1}^{TG}$            | 0.141<br>(1.47)      | 0.143<br>(1.55)      | 0.143<br>(1.38)      |                      |                      |                      |                      |                      |                      |                      |                      |                      |
| $RTI_{M,t-1}^{ATG}$           |                      |                      |                      | 0.234**<br>(2.46)    | 0.246***<br>(2.68)   | 0.246**<br>(2.37)    |                      |                      |                      |                      |                      |                      |
| $AVG^{AQ}(RTI_{M,t-1}^{TG})$  |                      |                      |                      |                      |                      |                      | 0.464**<br>(2.21)    | 0.539***<br>(2.60)   | 0.539**<br>(2.33)    |                      |                      |                      |
| $AVG^{AQ}(RTI_{M,t-1}^{ATG})$ |                      |                      |                      |                      |                      |                      |                      |                      |                      | 0.480**<br>(2.13)    | 0.502**<br>(2.27)    | 0.502**<br>(2.09)    |
| $Size_{t-1}$                  | -70.65***<br>(-5.19) | -67.14***<br>(-4.91) | -67.14<br>(-1.44)    | -71.07***<br>(-5.22) | -67.54***<br>(-4.94) | -67.54<br>(-1.45)    | -87.08***<br>(-4.91) | -86.71***<br>(-4.82) | -86.71<br>(-1.63)    | -87.77***<br>(-4.96) | -87.20***<br>(-4.86) | -87.20<br>(-1.64)    |
| $BM_{t-1}$                    | 159.2**<br>(2.39)    | 116.7*<br>(1.79)     | 116.7<br>(0.48)      | 158.5**<br>(2.38)    | 115.9*<br>(1.77)     | 115.9<br>(0.48)      | 107.0<br>(1.13)      | 63.32<br>(0.69)      | 63.32<br>(0.20)      | 106.3<br>(1.12)      | 63.13<br>(0.69)      | 63.13<br>(0.20)      |
| $Illiquidity_{t-1}$           | 13.15***<br>(6.34)   | 13.00***<br>(6.27)   | 13.00***<br>(2.83)   | 12.99***<br>(6.28)   | 12.82***<br>(6.20)   | 12.82***<br>(2.79)   | 12.55***<br>(4.99)   | 11.81***<br>(4.73)   | 11.81**<br>(2.40)    | 12.46***<br>(4.98)   | 11.83***<br>(4.76)   | 11.83***<br>(2.44)   |
| $LogTNA_{t-1}$                | -10.28***<br>(-3.47) | -7.998***<br>(-2.74) | -7.998<br>(-1.11)    | -10.05***<br>(-3.40) | -7.744***<br>(-2.66) | -7.744<br>(-1.07)    | -13.67***<br>(-3.68) | -10.71***<br>(-2.91) | -10.71<br>(-1.13)    | -13.56***<br>(-3.64) | -10.69***<br>(-2.90) | -10.69<br>(-1.13)    |
| $LogAge_{t-1}$                | 1.798<br>(0.29)      | -4.774<br>(-0.78)    | -4.774<br>(-0.47)    | 1.585<br>(0.25)      | -5.007<br>(-0.82)    | -5.007<br>(-0.49)    | 18.76**<br>(2.22)    | 13.45<br>(1.64)      | 13.45<br>(1.22)      | 18.70**<br>(2.21)    | 13.48*<br>(1.65)     | 13.48<br>(1.22)      |
| $ExpRatio_{t-1}$              | -80.14***<br>(-7.64) | -71.22***<br>(-6.80) | -71.22***<br>(-3.40) | -80.55***<br>(-7.67) | -71.65***<br>(-6.84) | -71.65***<br>(-3.43) | -85.37***<br>(-5.28) | -75.33***<br>(-4.63) | -75.33***<br>(-3.24) | -85.29***<br>(-5.26) | -74.98***<br>(-4.60) | -74.98***<br>(-3.24) |
| $Turnover_{t-1}$              | -0.736***<br>(-3.43) | -0.818***<br>(-3.90) | -0.818*<br>(-1.96)   | -0.736***<br>(-3.43) | -0.818***<br>(-3.90) | -0.818*<br>(-1.96)   | -1.008***<br>(-3.75) | -0.936***<br>(-3.58) | -0.936<br>(-1.63)    | -1.012***<br>(-3.77) | -0.943***<br>(-3.61) | -0.943<br>(-1.64)    |
| $Flow_{t-1}$                  | 0.0062<br>(1.08)     | 0.0063<br>(1.20)     | 0.0063<br>(1.14)     | 0.0062<br>(1.09)     | 0.0063<br>(1.21)     | 0.0063<br>(1.15)     | 0.0196<br>(0.17)     | -0.0465<br>(-0.41)   | -0.0465<br>(-0.55)   | 0.0157<br>(0.14)     | -0.0507<br>(-0.45)   | -0.0507<br>(-0.60)   |
| Style FE                      | Yes                  | No                   | No                   |
| Time FE                       | Yes                  | No                   | No                   |
| StyleQuarter FE               | No                   | Yes                  | Yes                  |
| Clustering                    | Fund                 | Fund                 | Fund<br>Quarter      |
| Adjusted $R^2$                | 0.02                 | 0.05                 | 0.05                 | 0.02                 | 0.05                 | 0.05                 | 0.03                 | 0.06                 | 0.06                 | 0.03                 | 0.06                 | 0.06                 |
| Observations                  | 143,080              | 143,080              | 143,080              | 143,080              | 143,080              | 143,080              | 92,425               | 92,425               | 92,425               | 92,425               | 92,425               | 92,425               |

**Panel B: Fama-Macbeth regressions**

|                               | Dependent Variable: Alpha |           |           |           |           |           |           |           |
|-------------------------------|---------------------------|-----------|-----------|-----------|-----------|-----------|-----------|-----------|
|                               | (1)                       | (2)       | (3)       | (4)       | (5)       | (6)       | (7)       | (8)       |
| $RTI_{M,t-1}^{TG}$            | 0.204*                    | 0.217*    |           |           |           |           |           |           |
|                               | (1.74)                    | (1.90)    |           |           |           |           |           |           |
| $RTI_{M,t-1}^{ATG}$           |                           |           | 0.266**   | 0.294**   |           |           |           |           |
|                               |                           |           | (2.06)    | (2.19)    |           |           |           |           |
| $AVG^{AQ}(RTI_{M,t-1}^{TG})$  |                           |           |           |           | 0.510*    | 0.453     |           |           |
|                               |                           |           |           |           | (1.79)    | (1.59)    |           |           |
| $AVG^{AQ}(RTI_{M,t-1}^{ATG})$ |                           |           |           |           |           |           | 0.409     | 0.285     |
|                               |                           |           |           |           |           |           | (1.29)    | (0.90)    |
| $Size_{t-1}$                  | -41.96                    | -85.99*   | -41.82    | -85.91*   | -41.47    | -87.15    | -42.17    | -88.09    |
|                               | (-0.81)                   | (-1.77)   | (-0.81)   | (-1.77)   | (-0.70)   | (-1.51)   | (-0.71)   | (-1.52)   |
| $BM_{t-1}$                    | 68.90                     | -69.38    | 68.44     | -73.73    | 26.35     | -149.9    | 21.97     | -159.1    |
|                               | (0.23)                    | (-0.30)   | (0.23)    | (-0.31)   | (0.08)    | (-0.55)   | (0.07)    | (-0.58)   |
| $Illiquidity_{t-1}$           | 1.196                     | 11.13**   | 1.045     | 10.98**   | 0.783     | 9.359*    | 0.874     | 9.507*    |
|                               | (0.28)                    | (2.61)    | (0.25)    | (2.58)    | (0.16)    | (1.86)    | (0.18)    | (1.89)    |
| $LogTNA_{t-1}$                | -5.181                    | -4.878    | -5.441    | -5.063    | -11.79    | -11.52    | -11.76    | -11.62    |
|                               | (-0.81)                   | (-0.78)   | (-0.85)   | (-0.81)   | (-1.60)   | (-1.56)   | (-1.59)   | (-1.57)   |
| $LogAge_{t-1}$                | -1.604                    | -5.059    | -1.105    | -4.717    | 16.84     | 14.81     | 17.24     | 15.30     |
|                               | (-0.14)                   | (-0.46)   | (-0.10)   | (-0.42)   | (1.31)    | (1.15)    | (1.34)    | (1.18)    |
| $ExpRatio_{t-1}$              | -69.98***                 | -75.49*** | -71.08*** | -76.70*** | -79.63*** | -81.76*** | -77.81*** | -79.47*** |
|                               | (-2.84)                   | (-3.37)   | (-2.87)   | (-3.41)   | (-2.84)   | (-3.19)   | (-2.78)   | (-3.11)   |
| $Turnover_{t-1}$              | -0.780*                   | -0.823**  | -0.778*   | -0.815**  | -1.479*** | -1.413*** | -1.474*** | -1.412*** |
|                               | (-1.84)                   | (-2.09)   | (-1.83)   | (-2.07)   | (-2.65)   | (-2.79)   | (-2.63)   | (-2.78)   |
| $Flow_{t-1}$                  | 0.508*                    | 0.466*    | 0.510*    | 0.466*    | 0.798     | 0.614     | 0.772     | 0.587     |
|                               | (1.95)                    | (1.82)    | (1.95)    | (1.81)    | (1.65)    | (1.37)    | (1.59)    | (1.30)    |
| Style Dummies                 | No                        | Yes       | No        | Yes       | No        | Yes       | No        | Yes       |
| Observations                  | 143,080                   | 143,080   | 143,080   | 143,080   | 92,425    | 92,425    | 92,425    | 92,425    |

## Electronic Appendix: Table 2 Fund Management Characteristics and $RTI_M$ Based on Bounded Measure of Change-in-Holdings

This table shows the regressions of  $RTI_M$  (defined as in Table 1 of this Appendix) on the fund management characteristics. Superscripts  $TG$  and  $ATG$  denote the corresponding underlying stock-level tangibility measures. The fund management characteristics (control variables) are defined as in Table 10 (Table 1) of the paper. For convenience of presentation, the coefficients for *Tenure*, *FundAffiliation*, *NrManagers*, *ManagerStyles*, *Illiquidity*, *LogTNA*, *LogAge*, *ExpRatio*, *Turnover*, and *Flow* are scaled by  $10^3$ . *T*-statistics are reported in parentheses. \* (\*\*, \*\*\*) indicates the significance of the coefficient at the 10% (5%, 1%) level.

|                                              | Dependent Variable:   |                       |                       |                       |                       |                       |                       |                       |                       |                       |
|----------------------------------------------|-----------------------|-----------------------|-----------------------|-----------------------|-----------------------|-----------------------|-----------------------|-----------------------|-----------------------|-----------------------|
|                                              | $RTI_{M,t}^{TG}$      |                       |                       |                       |                       | $RTI_{M,t}^{ATG}$     |                       |                       |                       |                       |
|                                              | (1)                   | (2)                   | (3)                   | (4)                   | (5)                   | (6)                   | (7)                   | (8)                   | (9)                   | (10)                  |
| <i>Tenure</i> <sub><i>t-1</i></sub>          | 0.309**<br>(2.30)     |                       |                       |                       | 0.188<br>(1.29)       | 0.349***<br>(2.74)    |                       |                       |                       | 0.275*<br>(1.91)      |
| <i>FundAffiliation</i> <sub><i>t-1</i></sub> |                       | -0.360***<br>(-3.14)  |                       |                       | -0.163<br>(-0.82)     |                       | -0.377***<br>(-3.42)  |                       |                       | -0.317<br>(-1.46)     |
| <i>NrManagers</i> <sub><i>t-1</i></sub>      |                       |                       | -0.718***<br>(-6.26)  |                       | -0.655***<br>(-4.37)  |                       |                       | -0.706***<br>(-6.14)  |                       | -0.713***<br>(-4.65)  |
| <i>ManagerStyles</i> <sub><i>t-1</i></sub>   |                       |                       |                       | -1.729***<br>(-5.89)  | -0.970**<br>(-2.55)   |                       |                       |                       | -1.479***<br>(-4.66)  | -0.465<br>(-1.13)     |
| <i>Size</i> <sub><i>t-1</i></sub>            | -1.410<br>(-1.49)     | -1.314<br>(-1.40)     | -1.452<br>(-1.54)     | -1.261<br>(-1.28)     | -1.360<br>(-1.37)     | -1.711*<br>(-1.94)    | -1.603*<br>(-1.82)    | -1.739**<br>(-1.98)   | -1.572*<br>(-1.72)    | -1.693*<br>(-1.84)    |
| <i>BM</i> <sub><i>t-1</i></sub>              | 6.892*<br>(1.79)      | 6.838*<br>(1.78)      | 6.634*<br>(1.73)      | 8.303**<br>(2.00)     | 8.203**<br>(1.98)     | 9.777**<br>(2.42)     | 9.718**<br>(2.41)     | 9.521**<br>(2.37)     | 11.64**<br>(2.48)     | 11.52**<br>(2.45)     |
| <i>Illiquidity</i> <sub><i>t-1</i></sub>     | 0.990***<br>(5.91)    | 1.013***<br>(6.12)    | 1.006***<br>(6.06)    | 1.097***<br>(6.23)    | 1.072***<br>(6.04)    | 0.936***<br>(5.55)    | 0.962***<br>(5.81)    | 0.955***<br>(5.75)    | 1.033***<br>(5.76)    | 1.000***<br>(5.52)    |
| <i>LogTNA</i> <sub><i>t-1</i></sub>          | -1.434***<br>(-6.20)  | -1.448***<br>(-6.28)  | -1.365***<br>(-5.95)  | -1.384***<br>(-5.73)  | -1.260***<br>(-5.14)  | -1.573***<br>(-7.16)  | -1.592***<br>(-7.22)  | -1.511***<br>(-6.85)  | -1.553***<br>(-6.47)  | -1.404***<br>(-5.87)  |
| <i>LogAge</i> <sub><i>t-1</i></sub>          | 0.1000<br>(0.23)      | 0.274<br>(0.62)       | 0.240<br>(0.55)       | -0.124<br>(-0.25)     | -0.410<br>(-0.84)     | 0.498<br>(1.16)       | 0.707*<br>(1.66)      | 0.680<br>(1.59)       | 0.267<br>(0.58)       | -0.130<br>(-0.29)     |
| <i>ExpRatio</i> <sub><i>t-1</i></sub>        | 3.680***<br>(4.32)    | 3.630***<br>(4.25)    | 3.649***<br>(4.27)    | 2.704***<br>(3.43)    | 2.714***<br>(3.41)    | 3.363***<br>(4.64)    | 3.306***<br>(4.53)    | 3.326***<br>(4.56)    | 3.173***<br>(3.71)    | 3.179***<br>(3.70)    |
| <i>Turnover</i> <sub><i>t-1</i></sub>        | -0.0433***<br>(-3.22) | -0.0459***<br>(-3.46) | -0.0477***<br>(-3.59) | -0.0439***<br>(-3.14) | -0.0415***<br>(-2.99) | -0.0587***<br>(-4.54) | -0.0617***<br>(-4.86) | -0.0636***<br>(-5.04) | -0.0660***<br>(-4.90) | -0.0621***<br>(-4.59) |
| <i>Flow</i> <sub><i>t-1</i></sub>            | 0.0007*<br>(1.70)     | 0.0007*<br>(1.68)     | 0.0006*<br>(1.69)     | 0.0007*<br>(1.68)     | 0.0007*<br>(1.69)     | -0.0002***<br>(-3.63) | -0.0002***<br>(-3.79) | -0.0002***<br>(-4.06) | -0.0002***<br>(-3.74) | -0.0002***<br>(-3.87) |
| StyleQuarter FE                              | Yes                   |
| Clustering                                   | Fund<br>Quarter       |
| Adjusted R <sup>2</sup>                      | 0.04                  | 0.04                  | 0.04                  | 0.04                  | 0.04                  | 0.04                  | 0.04                  | 0.04                  | 0.04                  | 0.04                  |
| Observations                                 | 44,140                | 44,140                | 44,140                | 36,708                | 36,708                | 44,163                | 44,163                | 44,163                | 36,701                | 36,701                |

### Electronic Appendix: Table 3 Fund Performance and *RTI* Based on Alternative Second-Stage Regression Specification

This table shows the regressions of fund monthly *Alpha* on the alternative measures of fund *RTI*. *Alpha* is computed as the fund's net return in excess of the return predicted by the four-factor model (MKT, SMB, HML, and MOM) in which the factor loadings are estimated over the 36 months preceding the observation period. Subscripts *K* and *M* indicate the measures of change-in-holdings, while superscripts *TG* and *ATG* denote the corresponding underlying stock-level tangibility measures. The coefficients for *Illiquidity*, *LogTNA*, *LogAge*, *ExpRatio*, *Turnover*, and *Flow* are scaled by  $10^3$ . The control variables are defined as in Table 1 of the paper. *T*-statistics are reported in parentheses. \* (\*\*, \*\*\*) indicates the significance of the coefficient at the 10% (5%, 1%) level. *RTI* is defined in the two-stage procedure as follows:

1. The change-in-holdings ( $\Delta Holdings_{imt}$ ) measures are indexed *K* and *M* and are defined as in Table 3 of the paper and Table 1 of this Appendix. The change-in-holdings is regressed on several control variables:

$$\Delta Holdings_{imt} = \beta_{0t} + \beta_{1t} \Delta Rec_{it-1} + \beta_{2t} \Delta Freq_{it-1} + \beta_{3t} Return_{it-1} + \beta_{4t} \Delta StyleHoldings_{imt} + \varepsilon_{imt}$$

where  $\Delta Rec_{it}$  is the change in the average analyst recommendation score (these range from 1, most pessimistic, to 5, most optimistic) from quarter *t-1* to *t*;  $\Delta Freq_{it}$  is the change in the news frequency (the number of articles on company *i*) from quarter *t-1* to *t*;  $Return_{it}$  is company *i*'s stock return from quarter *t-1* to *t*; and  $\Delta StyleHoldings_{imt}$  is the average change-in-holdings for stock *i* of all the Morningstar funds in the style of fund *m*.

2. The absolute values of the residuals from the previous regression are now regressed on the signed shocks in tangibility:

$$|\varepsilon_{imt}| = \beta_{0t} + \beta_{1t} \Delta Tangibility_{it-1} + u_{imt}$$

*RTI* is defined as the  $R^2$  of this regression.

|                     | Dependent Variable: Alpha |                      |                      |                      |                      |                      |                      |                      |                      |                      |                      |                      |
|---------------------|---------------------------|----------------------|----------------------|----------------------|----------------------|----------------------|----------------------|----------------------|----------------------|----------------------|----------------------|----------------------|
|                     | (1)                       | (2)                  | (3)                  | (4)                  | (5)                  | (6)                  | (7)                  | (8)                  | (9)                  | (10)                 | (11)                 | (12)                 |
| $RTI_{K,t-1}^{TG}$  | 0.196**<br>(2.02)         | 0.175*<br>(1.84)     | 0.175<br>(1.57)      |                      |                      |                      |                      |                      |                      |                      |                      |                      |
| $RTI_{K,t-1}^{ATG}$ |                           |                      |                      | 0.160<br>(1.62)      | 0.163*<br>(1.69)     | 0.163*<br>(1.72)     |                      |                      |                      |                      |                      |                      |
| $RTI_{M,t-1}^{TG}$  |                           |                      |                      |                      |                      |                      | 0.177*<br>(1.73)     | 0.204**<br>(2.05)    | 0.204<br>(1.34)      |                      |                      |                      |
| $RTI_{M,t-1}^{ATG}$ |                           |                      |                      |                      |                      |                      |                      |                      |                      | 0.122<br>(1.22)      | 0.167*<br>(1.73)     | 0.167<br>(1.41)      |
| $Size_{t-1}$        | -70.41***<br>(-5.17)      | -66.96***<br>(-4.89) | -66.96<br>(-1.44)    | -70.54***<br>(-5.18) | -67.03***<br>(-4.90) | -67.03<br>(-1.44)    | -70.53***<br>(-5.18) | -66.97***<br>(-4.89) | -66.97<br>(-1.44)    | -70.63***<br>(-5.18) | -67.08***<br>(-4.90) | -67.08<br>(-1.44)    |
| $BM_{t-1}$          | 158.0**<br>(2.37)         | 115.6*<br>(1.77)     | 115.6<br>(0.47)      | 159.1**<br>(2.39)    | 116.6*<br>(1.79)     | 116.6<br>(0.48)      | 159.3**<br>(2.39)    | 116.3*<br>(1.78)     | 116.3<br>(0.48)      | 159.2**<br>(2.39)    | 116.1*<br>(1.78)     | 116.1<br>(0.48)      |
| $Illiquidity_{t-1}$ | 13.12***<br>(6.33)        | 12.98***<br>(6.27)   | 12.98***<br>(2.84)   | 13.13***<br>(6.33)   | 12.98***<br>(6.27)   | 12.98***<br>(2.83)   | 13.12***<br>(6.32)   | 12.94***<br>(6.25)   | 12.94***<br>(2.80)   | 13.17***<br>(6.33)   | 12.97***<br>(6.25)   | 12.97***<br>(2.81)   |
| $LogTNA_{t-1}$      | -10.25***<br>(-3.46)      | -8.011***<br>(-2.74) | -8.011<br>(-1.11)    | -10.30***<br>(-3.47) | -8.024***<br>(-2.74) | -8.024<br>(-1.12)    | -10.21***<br>(-3.44) | -7.870***<br>(-2.69) | -7.870<br>(-1.08)    | -10.32***<br>(-3.47) | -7.950***<br>(-2.72) | -7.950<br>(-1.09)    |
| $LogAge_{t-1}$      | 1.734<br>(0.28)           | -4.794<br>(-0.78)    | -4.794<br>(-0.47)    | 1.734<br>(0.28)      | -4.833<br>(-0.79)    | -4.833<br>(-0.48)    | 1.654<br>(0.26)      | -4.975<br>(-0.81)    | -4.975<br>(-0.49)    | 1.741<br>(0.28)      | -4.926<br>(-0.80)    | -4.926<br>(-0.49)    |
| $ExpRatio_{t-1}$    | -80.56***<br>(-7.69)      | -71.53***<br>(-6.84) | -71.53***<br>(-3.42) | -80.32***<br>(-7.65) | -71.43***<br>(-6.82) | -71.43***<br>(-3.42) | -80.36***<br>(-7.67) | -71.57***<br>(-6.85) | -71.57***<br>(-3.45) | -80.04***<br>(-7.62) | -71.34***<br>(-6.81) | -71.34***<br>(-3.43) |
| $Turnover_{t-1}$    | -0.730***<br>(-3.40)      | -0.814***<br>(-3.88) | -0.814*<br>(-1.94)   | -0.732***<br>(-3.41) | -0.815***<br>(-3.88) | -0.815*<br>(-1.94)   | -0.732***<br>(-3.42) | -0.815***<br>(-3.89) | -0.815*<br>(-1.94)   | -0.735***<br>(-3.42) | -0.816***<br>(-3.89) | -0.816*<br>(-1.94)   |
| $Flow_{t-1}$        | 0.0062<br>(1.08)          | 0.0063<br>(1.19)     | 0.0063<br>(1.13)     | 0.0062<br>(1.08)     | 0.0062<br>(1.19)     | 0.0062<br>(1.13)     | 0.0062<br>(1.08)     | 0.0063<br>(1.20)     | 0.0063<br>(1.14)     | 0.0062<br>(1.07)     | 0.0063<br>(1.19)     | 0.0063<br>(1.13)     |
| Style FE            | Yes                       | No                   | No                   | Yes                  | No                   | No                   | Yes                  | No                   | No                   | Yes                  | No                   | No                   |
| Time FE             | Yes                       | No                   | No                   | Yes                  | No                   | No                   | Yes                  | No                   | No                   | Yes                  | No                   | No                   |
| StyleQuarter FE     | No                        | Yes                  | Yes                  | No                   | Yes                  | Yes                  | No                   | Yes                  | Yes                  | No                   | Yes                  | Yes                  |
| Clustering          | Fund                      | Fund                 | Fund<br>Quarter      | Fund                 | Fund                 | Fund<br>Quarter      | Fund                 | Fund                 | Fund<br>Quarter      | Fund                 | Fund                 | Fund<br>Quarter      |
| Adjusted $R^2$      | 0.02                      | 0.05                 | 0.05                 | 0.02                 | 0.05                 | 0.05                 | 0.02                 | 0.05                 | 0.05                 | 0.02                 | 0.05                 | 0.05                 |
| Observations        | 143,080                   | 143,080              | 143,080              | 143,080              | 143,080              | 143,080              | 143,080              | 143,080              | 143,080              | 143,080              | 143,080              | 143,080              |

**Electronic Appendix: Table 4 Relationship between *RTI* and Fund Performance, *RTI* is  
Recomputed Net of Flow**

This table complements Table 5 in the paper. It shows the effect of *RTI* on alpha, where *RTI* is computed with the contemporaneous fund flow added to the first-stage regression.

|                               | Dependent Variable: Alpha |                      |                      |                      |
|-------------------------------|---------------------------|----------------------|----------------------|----------------------|
|                               | (1)                       | (2)                  | (3)                  | (4)                  |
| $RTI_{K,t-1}^{TG}$            | 0.207**<br>(2.24)         |                      |                      |                      |
| $RTI_{K,t-1}^{ATG}$           |                           | 0.245**<br>(2.33)    |                      |                      |
| $AVG^{4Q}(RTI_{K,t-1}^{TG})$  |                           |                      | 0.615***<br>(3.24)   |                      |
| $AVG^{4Q}(RTI_{K,t-1}^{ATG})$ |                           |                      |                      | 0.749***<br>(3.78)   |
| $Size_{t-1}$                  | -64.18<br>(-1.38)         | -64.23<br>(-1.38)    | -77.95<br>(-1.43)    | -77.73<br>(-1.43)    |
| $BM_{t-1}$                    | 141.7<br>(0.58)           | 142.9<br>(0.58)      | 116.9<br>(0.38)      | 118.1<br>(0.39)      |
| $Illiquidity_{t-1}$           | 13.01***<br>(2.88)        | 12.95***<br>(2.86)   | 12.07**<br>(2.49)    | 11.90**<br>(2.46)    |
| $LogTNA_{t-1}$                | -9.198<br>(-1.29)         | -9.123<br>(-1.28)    | -11.19<br>(-1.27)    | -10.98<br>(-1.24)    |
| $LogAge_{t-1}$                | -5.397<br>(-0.54)         | -5.572<br>(-0.56)    | 8.265<br>(0.80)      | 7.869<br>(0.77)      |
| $ExpRatio_{t-1}$              | -73.39***<br>(-3.34)      | -73.68***<br>(-3.37) | -79.20***<br>(-3.22) | -80.24***<br>(-3.28) |
| $Turnover_{t-1}$              | -0.881**<br>(-2.10)       | -0.879**<br>(-2.10)  | -1.210**<br>(-2.31)  | -1.200**<br>(-2.29)  |
| $Flow_{t-1}$                  | 0.0063<br>(1.13)          | 0.0063<br>(1.13)     | 0.0003<br>(0.06)     | 0.0004<br>(0.08)     |
| StyleQuarter FE               | Yes                       | Yes                  | Yes                  | Yes                  |
| Clustering                    | Fund                      | Fund                 | Fund                 | Fund                 |
|                               | Quarter                   | Quarter              | Quarter              | Quarter              |
| Adjusted $R^2$                | 0.05                      | 0.05                 | 0.05                 | 0.05                 |
| Observations                  | 145,919                   | 145,919              | 102,222              | 102,222              |

**Electronic Appendix: Table 5 Average Values of Different Measures of Skill in Below- and Above-Median  $RTI$  Samples**

This table shows the average values of different measures of skill in the subsamples split by the median  $RTI$ .

| Variable            | Partition by $RTI_K^{TG}$ |              | Partition by $RTI_K^{ATG}$ |              |
|---------------------|---------------------------|--------------|----------------------------|--------------|
|                     | Below median              | Above median | Below median               | Above median |
| $RTI_K^{TG}$        | 0.003                     | 0.056        | 0.011                      | 0.048        |
| $RTI_K^{ATG}$       | 0.011                     | 0.049        | 0.003                      | 0.055        |
| <i>ActiveShare</i>  | 0.690                     | 0.781        | 0.691                      | 0.780        |
| <i>TwelveBIFee</i>  | 0.27%                     | 0.28%        | 0.27%                      | 0.28%        |
| <i>ReturnGap</i>    | -0.25%                    | -0.25%       | -0.23%                     | -0.26%       |
| <i>MarketTiming</i> | -0.02%                    | -0.03%       | -0.02%                     | -0.02%       |
| <i>StockPicking</i> | 0.37%                     | 0.52%        | 0.37%                      | 0.52%        |
